# Supplementary material for: Teaching antenatal hand expression: a feasibility study in an inner urban U.S. hospital
Source: PubMed Central journal article supplement (PMC10416364; doi:10.1186/s13006-023-00578-w), 2023-08-10
Supplement: 13006_2023_578_MOESM1_ESM.pdf [file 13006_2023_578_MOESM1_ESM.pdf]

Additional File 1: Daily Hand Expression Tracker

Today's Date \_\_\_\_\_

How many times did you try to hand express today?

0       1       2       3       > 3

How many total minutes did you hand express today?

< 5       5 – 10       10 – 15       15 – 20       20 – 25       25 – 30       > 30

How many milliliters of milk did you hand express today?  
\_\_\_\_\_ mL

How confident do you feel with hand expression today?

very uncomfortable       uncomfortable       neutral  
 comfortable       very comfortable

My thoughts about hand expression today: \_\_\_\_\_  
\_\_\_\_\_  
\_\_\_\_\_  
\_\_\_\_\_

### ***Daily Hand Expression Tracker***

Did you feel any contractions today?

yes       no

If yes,

How many contractions did you feel every minute?  
\_\_\_\_\_ / min

How often were these contractions occurring?  
every \_\_\_\_\_ hour(s)

Did you feel any discomfort today?

yes       no

If yes, please describe \_\_\_\_\_  
\_\_\_\_\_  
\_\_\_\_\_
