# Supplementary material for: Teaching antenatal hand expression: a feasibility study in an inner urban U.S. hospital
Source: PubMed Central journal article supplement (PMC10416364; doi:10.1186/s13006-023-00578-w), 2023-08-10
Supplement: 13006_2023_578_MOESM2_ESM.pdf [file 13006_2023_578_MOESM2_ESM.pdf]

Additional File 2: Postpartum survey

Post Delivery Survey

Participant ID \_\_\_\_\_

Date \_\_\_\_\_

1. **Have you initiated breastfeeding?**      Yes      No
  
2. **Have you ever breastfed in the past?**      Yes      No
  
3. **Have you ever done hand expression before this study?**      Yes      No
  
4. **Have you practiced hand milk expression at home?**      Yes      No  
    **If yes, how many times have you practiced at home?**      \_\_\_\_\_
  
5. **Did you encounter any problems when you practiced?**      Yes      No  
    **If yes, what kind of problems have you encountered?**

6. **How satisfied were you with the experience of hand milk expression?**

1      2      3      4      5      6      7      8      9      10

Not satisfied at all

Extremely satisfied

7. **How helpful was the hand expression education provided by the research team?**

1      2      3      4      5      6      7      8      9      10

Not helpful at all

Extremely helpful

8. **Do you think practicing hand expression helped initiating breastfeeding easier?**

1      2      3      4      5      6      7      8      9      10

Not at all

Extremely so

9. **Do you plan on exclusively breastfeeding?**      Yes      No

**If yes, how likely will you continue exclusively breastfeeding?**

1      2      3      4      5      6      7      8      9      10

Not likely at all

Extremely likely

**If no or not likely to continue, name any barriers preventing you from exclusively breastfeeding.**

|

10. **How likely would you recommend hand milk expression to your friends and families?**

1      2      3      4      5      6      7      8      9      10

Not likely at all

Extremely likely
